# Supplementary material for: Fosmidomycin, an inhibitor of isoprenoid synthesis, induces persistence in Chlamydia by inhibiting peptidoglycan assembly
Source: PLoS Pathog. 2019 Oct 17;15(10):e1008078. doi: 10.1371/journal.ppat.1008078 (PMC6818789; doi:10.1371/journal.ppat.1008078)
Supplement: S1 Fig — (PDF) [file ppat.1008078.s001.pdf]

|                |                         |                     |                     |                     |                     |
|----------------|-------------------------|---------------------|---------------------|---------------------|---------------------|
|                | 1                       | 11                  | 21                  | 31                  | 41                  |
| Consensus      | MKqLa i i GST           | GSIGcqtLqV          | VRhiPe hFi i        | eaLaAGkNqe          | amisQirEFs          |
| Conservation   | ■ ■ ■ ■ ■               | ■ ■ ■ ■ ■           | ■ ■ ■ ■ ■           | ■ ■ ■ ■ ■           | ■ ■ ■ ■ ■           |
| Ctl2_dxr.pdb   | 1 MKH L A L I GST       | GSIGRQVLQV          | VRS I P D T F I I   | ETLAAGR NQE         | ALISQIR EFN         |
| E_coli_dxr.pdb | 1 MKQLT I L GST         | GSIGCSTLDV          | VRHNPEHF RV         | VALVAGKNVT          | RMVEQCL EFS         |
|                | 51                      | 61                  | 71                  | 81                  | 91                  |
| Consensus      | PRyaa mreEa             | syKeLkkml.          | . . . phiE i Ls     | GqqaacsmAa          | epsVt i t i aA      |
| Conservation   | ■ ■ ■ ■ ■               | ■ ■ ■ ■ ■           | ■ ■ ■ ■ ■           | ■ ■ ■ ■ ■           | ■ ■ ■ ■ ■           |
| Ctl2_dxr.pdb   | 51 PRV VAVR EET         | TYKELRKLF.          | . . . PHIE I L L    | GEEGLVSVAT          | EPSVT I T I VA      |
| E_coli_dxr.pdb | 51 PRYAVMDDEA           | SAKLLK TMLQ         | QQGSRT E VLS        | GQQAACDMAA          | LEDVDQVMAA          |
|                | 101                     | 111                 | 121                 | 131                 | 141                 |
| Consensus      | i sGi a a Lpa t         | iAAIRqkKTI          | a LANKESLVa         | aGrL f m t a a k    | q s k a Q i L P i D |
| Conservation   | ■ ■ ■ ■ ■               | ■ ■ ■ ■ ■           | ■ ■ ■ ■ ■           | ■ ■ ■ ■ ■           | ■ ■ ■ ■ ■           |
| Ctl2_dxr.pdb   | 97 SSG I D A L PAV      | IAAIRQK KTI         | ALANKESLV A         | AGELVTTLAR          | ENG VQ I L P I D    |
| E_coli_dxr.pdb | 101 I V G A A G L L P T | LAAIRAG KTI         | LLANKESLV T         | CGR L F M DAVK      | QSKAQLLPVD          |
|                | 151                     | 161                 | 171                 | 181                 | 191                 |
| Consensus      | SEHNA i FQc L           | pqp . . . . .       | . . . eqst i k k    | i L L T a SGGP I    | Re k p k r e L q k  |
| Conservation   | ■ ■ ■ ■ ■               | ■ ■ ■ ■ ■           | ■ ■ ■ ■ ■           | ■ ■ ■ ■ ■           | ■ ■ ■ ■ ■           |
| Ctl2_dxr.pdb   | 147 SEHNALFQCL          | EGR . . . . .       | . . . DSST I K K    | LLL T A SGGP L      | RNKSKEELQK          |
| E_coli_dxr.pdb | 151 SEHNA I FQSL        | PQP I QHNLGY        | A D L EQNGVVS       | I L L T G SGGP F    | RET P L R D L A T   |
|                | 201                     | 211                 | 221                 | 231                 | 241                 |
| Consensus      | m s p q q a c RHP       | nWsMGpKI s V        | DSaTmmNKGL          | E i I EArWLFg       | a s A s q i E a l I |
| Conservation   | ■ ■ ■ ■ ■               | ■ ■ ■ ■ ■           | ■ ■ ■ ■ ■           | ■ ■ ■ ■ ■           | ■ ■ ■ ■ ■           |
| Ctl2_dxr.pdb   | 187 VSLQEVL RHP         | VWNMGPK I TV        | DSSTLVNKGL          | E I I EAFWLF G      | LEAVE I EAV I       |
| E_coli_dxr.pdb | 201 MTPDQACRHP          | NWSMGRK I S V       | DSATMMNKGL          | EYIEARWLFN          | ASASQMEVLI          |
|                | 251                     | 261                 | 271                 | 281                 | 291                 |
| Consensus      | HPQS l i HsMV           | ryqDGs i Laq        | mkpPsMr t P I       | qHtmawPeRs          | pa i g p p l D F c  |
| Conservation   | ■ ■ ■ ■ ■               | ■ ■ ■ ■ ■           | ■ ■ ■ ■ ■           | ■ ■ ■ ■ ■           | ■ ■ ■ ■ ■           |
| Ctl2_dxr.pdb   | 237 HPQSLVHGMV          | EFC DGT I LSV       | MKPPSMLFP I         | QHVLTFPERS          | PA I G P G F D F L  |
| E_coli_dxr.pdb | 251 HPQSVIHS MV         | RYQDGSVLAQ          | LGEPDMRTPI          | ATMAWPNRV           | NSGVKPLDFC          |
|                | 301                     | 311                 | 321                 | 331                 | 341                 |
| Consensus      | s l s a L e F a a i     | DyDRyPs l h L       | Akr a l e q k q a   | a t c a l N a A N E | a l V a a F L A q q |
| Conservation   | ■ ■ ■ ■ ■               | ■ ■ ■ ■ ■           | ■ ■ ■ ■ ■           | ■ ■ ■ ■ ■           | ■ ■ ■ ■ ■           |
| Ctl2_dxr.pdb   | 287 SNR T L E F F P I   | DEDRFP S V H L      | AKRVLL E KGS        | MGCFFNGANE          | ALVHRFLAGE          |
| E_coli_dxr.pdb | 301 KLSALTFAAP          | DYDRYPCLKL          | AMEAFEQQA           | ATTALNAANE          | ITVA AFLAQQ         |
|                | 351                     | 361                 | 371                 | 381                 | 391                 |
| Consensus      | I s w h q I a a k l     | q a l l e q h r m q | s p q s l e e i L S | VDAeARarAq          | k c . . . . .       |
| Conservation   | ■ ■ ■ ■ ■               | ■ ■ ■ ■ ■           | ■ ■ ■ ■ ■           | ■ ■ ■ ■ ■           | ■ ■ ■ ■ ■           |
| Ctl2_dxr.pdb   | 337 ISWHQIVPKL          | QALVDQHRVQ          | SCLSL E E I L S     | VD A E A R A R A Q  | EC . . . . .        |
| E_coli_dxr.pdb | 351 I R F T D I A A L N | LSVLEKMDMR          | EPQCVD D VLS        | VDANAREVAR          | KEVMRLA             |
